# Supplementary material for: Cytotoxic Labdane Diterpenes from Hedychium ellipticum Buch.-Ham. ex Sm
Source: PubMed Central journal article supplement (PMC6273991; doi:10.3390/molecules21060749), 2016-06-09
Supplement: molecules-21-00749-s001.pdf [file molecules-21-00749-s001.pdf]

# Supplementary Materials: Cytotoxic Labdane Diterpenes from *Hedychium ellipticum* Buch.-Ham. ex Sm.

Sineenard Songsri, Apichart Suksamrarn and Nuchnipa Nuntawong

## Spectroscopic Data of Compounds 1–10

**Coronararin E (1):** pale yellow oil;  $[\alpha]_D^{29} = +19.70$  (c 0.57, CHCl<sub>3</sub>); EIMS:  $m/z$  284 [M]<sup>+</sup> (100); 269 (9), 147 (95), 137 (28), 69 (14), 55 (20), 41 (17); <sup>1</sup>H-NMR (400 MHz, CDCl<sub>3</sub>):  $\delta$  0.82 (3H, s, H-20), 0.83 (3H, s, H-19), 0.88 (3H, s, H-18), 1.01 (dt,  $J = 14.4, 4.2$  Hz, H-1 $\alpha$ ), 1.11 (1H, dd,  $J = 12.5, 2.6$  Hz, H-5), 1.18 (1H, m, H-3 $\alpha$ ), 1.35 (1H, m, H-6 $\alpha$ ), 1.40 (1H, m, H-3 $\beta$ ), 1.42 (1H, m, H-2 $\alpha$ ), 1.47 (1H, m, H-1 $\beta$ ), 1.50 (1H, m, H-2 $\beta$ ), 1.70 (1H, m, H-6 $\beta$ ), 2.10 (1H, dt,  $J = 13.2, 5.2$  Hz, H-7 $\beta$ ), 2.37 (1H, d,  $J = 9.8$  Hz, H-9), 2.45 (1H, m, 7 $\beta$ ), 4.51 (1H, d,  $J = 1.6$  Hz, H-17a), 4.74 (1H, d,  $J = 1.6$  Hz, H-17b), 5.96 (1H, dd,  $J = 15.7, 9.8$  Hz, H-11), 6.19 (1H, d,  $J = 15.7$  Hz, H-12), 6.52 (1H, s, H-14), 7.33 (2H, s, H-15, H-16); <sup>13</sup>C-NMR (100 MHz, CDCl<sub>3</sub>):  $\delta$  15.00 (C-20), 19.12 (C-2), 21.95 (C-19), 23.39 (C-6), 33.56 (C-4, 18), 36.77 (C-7), 39.15 (C-10), 40.78 (C-1), 42.32 (C-3), 54.63 (C-5), 61.48 (C-9), 107.65 (C-14), 107.96 (C-17), 121.75 (C-12), 124.51 (C-13), 128.29 (C-11), 139.59 (C-16), 143.24 (C-15), 150.22 (C-8); FTIR (neat):  $\nu = 2922, 1643, 1156$  cm<sup>-1</sup>.

**(E)-15,16-Bisnorlabda-8(17),11-dien-13-one (2):** pale yellow solid; mp 146.0–147.0 °C;  $[\alpha]_D^{29} = -8.50$  (c 0.67, CHCl<sub>3</sub>); EIMS:  $m/z$  260 [M]<sup>+</sup> (47); 245 (16), 217 (35), 137 (60), 81 (92), 69 (30), 43 (58); <sup>1</sup>H-NMR (400 MHz, CDCl<sub>3</sub>):  $\delta$  0.84 (3H, s, H-19), 0.89 (2 × 3H, s, H-18, H-20), 1.05 (1H, m, H-1 $\alpha$ ), 1.10 (1H, dd,  $J = 12.5, 2.6$  Hz, H-5), 1.20 (1H, m, H-3 $\alpha$ ), 1.37 (1H, m, H-1 $\beta$ ), 1.42 (1H, m, H-2 $\alpha$ ), 1.39 (1H, m, H-6 $\alpha$ ), 1.44 (1H, m, H-3 $\beta$ ), 1.54 (1H, m, H-2 $\beta$ ), 1.71 (1H, m, H-6 $\beta$ ), 2.09 (1H, dt,  $J = 12.5, 4.8$  Hz, H-7 $\alpha$ ), 2.48 (1H, d,  $J = 10.0$  Hz, H-9), 2.45 (1H, overlapping, H-7 $\beta$ ), 4.40 (1H, br s, H-17a), 4.79 (1H, br s, H-17b), 6.07 (1H, d,  $J = 15.8$  Hz, H-12), 6.87 (1H, dd,  $J = 15.8, 10.0$  Hz, H-11); <sup>13</sup>C-NMR (100 MHz, CDCl<sub>3</sub>):  $\delta$  15.11 (C-20), 18.99 (C-2), 21.92 (C-19), 23.23 (C-6), 33.54 (C-4), 33.57 (C-18), 36.61 (C-7), 39.33 (C-10), 40.86 (C-1), 42.09 (C-3), 54.45 (C-5), 60.79 (C-9), 108.61 (C-17), 133.57 (C-12), 146.72 (C-11), 148.61 (C-8), 198.18 (C-13); FTIR (neat):  $\nu = 2936, 1664, 1258, 898$  cm<sup>-1</sup>.

**(E)-14,15,16-Trinorlabda-8(17),11-dien-13-oic acid (3):** white amorphous;  $[\alpha]_D^{29} = +6.44$  (c 0.34, CHCl<sub>3</sub>); HREIMS: [M + Na]<sup>+</sup> 285.1830 (calcd for C<sub>17</sub>H<sub>26</sub>O<sub>2</sub>Na, 285.1831); <sup>1</sup>H-NMR (400 MHz, CDCl<sub>3</sub>):  $\delta$  0.84 (3H, s, H-19), 0.89 (2 × 3H, s, H-18, H-20), 1.03 (1H, m, H-1 $\alpha$ ), 1.09 (1H, dd,  $J = 12.5, 2.6$  Hz, H-5), 1.20 (1H, m, H-3 $\alpha$ ), 1.37 (1H, m, H-1 $\beta$ ), 1.40 (1H, m, H-2 $\alpha$ ), 1.39 (1H, m, H-6 $\alpha$ ), 1.44 (1H, m, H-3 $\beta$ ), 1.54 (1H, m, H-2 $\beta$ ), 1.71 (1H, m, H-6 $\beta$ ), 2.08 (1H, dt,  $J = 13.2, 5.0$  Hz, H-7 $\alpha$ ), 2.51 (1H, d,  $J = 10.5$  Hz, H-9), 2.45 (1H, overlapping, H-7 $\beta$ ), 4.42 (1H, br s, H-17a), 4.79 (1H, br s, H-17b), 5.83 (1H, d,  $J = 15.5$  Hz, H-12), 7.15 (1H, dd,  $J = 15.5, 10.5$  Hz, H-11); <sup>13</sup>C-NMR (100 MHz, CDCl<sub>3</sub>):  $\delta$  14.99 (C-20), 18.99 (C-2), 21.91 (C-19), 23.22 (C-6), 33.54 (C-4), 33.56 (C-18), 36.61 (C-7), 39.32 (C-10), 40.78 (C-1), 42.12 (C-3), 54.45 (C-5), 108.83 (C-17), 123.06 (C-12), 148.25 (C-9), 150.88 (C-11), 148.25 (C-8), 171.48 (C-13); FTIR (neat):  $\nu = 3449, 2934, 1684, 1460, 1201, 737$  cm<sup>-1</sup>.

**Villosin (4):** white amorphous powder; mp 124.5–125.0 °C;  $[\alpha]_D^{29} = +3.94$  (c 0.17, CHCl<sub>3</sub>); EIMS:  $m/z$  300 [M]<sup>+</sup> (19); 285 (10), 257 (4), 189 (6), 137 (100), 123 (22), 55 (15), 41 (20); <sup>1</sup>H-NMR (400 MHz, CDCl<sub>3</sub>):  $\delta$  0.80 (3H, s, H-20), 0.87 (3H, s, H-19), 0.89 (3H, s, H-18), 1.00 (1H, m, H-1 $\alpha$ ), 1.09 (1H, dd,  $J = 12.5, 2.5$  Hz, H-5), 1.17 (1H, m, H-3 $\alpha$ ), 1.35 (1H, m, H-3 $\beta$ ), 1.38 (1H, m, H-6 $\beta$ ), 1.41 (1H, m, H-1 $\beta$ ), 1.46 (1H, m, H-2 $\alpha$ ), 1.51 (1H, m, H-2 $\beta$ ), 1.70 (1H, m, H-6 $\alpha$ ), 2.08 (1H, dt,  $J = 13.4, 5.1$  Hz, H-7 $\alpha$ ), 2.37 (1H, d,  $J = 10.1$  Hz, H-9), 2.44 (1H, ddd,  $J = 13.4, 4.0, 2.0$  Hz, H-7 $\beta$ ), 4.50 (1H, br s, H-17a), 4.76 (1H, br s, H-17b), 4.81 (2H, br s, H-15), 6.11 (1H, d,  $J = 15.8$  Hz, H-12), 6.90 (1H, dd,  $J = 15.8, 10.1$  Hz, H-11), 7.15 (1H, br s, H-14); <sup>13</sup>C-NMR (100 MHz, CDCl<sub>3</sub>):  $\delta$  15.14 (C-20), 19.19 (C-2), 22.03 (C-19), 23.45 (C-6), 33.66 (C-4, 18), 36.83 (C-7), 39.31 (C-10), 40.89 (C-1), 42.29 (C-3), 54.75 (C-5), 62.28 (C-9), 69.69 (C-15), 108.49 (C-17), 120.75

(C-12), 129.56 (C-13), 136.92 (C-11), 142.55 (C-14), 149.50 (C-8), 172.46 (C-16); FTIR (neat):  $\nu = 2925, 1754, 1640, 1086, 1052, 947, 902, 833 \text{ cm}^{-1}$ .

(*E*)-*Labda-8(17),12-dien-15,16-dial* (5): pale yellow oil;  $[\alpha]_D^{29} = +8.61$  (*c* 0.26,  $\text{CHCl}_3$ ); EIMS:  $m/z$  302  $[\text{M}]^+$  (31); 273 (8), 177 (13), 137 (100), 81 (85);  $^1\text{H-NMR}$  (400 MHz,  $\text{CDCl}_3$ ):  $\delta$  0.73 (3H, s, H-20), 0.82 (3H, s, H-19), 0.89 (3H, s, H-18), 1.09 (1H, m, H-1 $\alpha$ ), 1.15 (1H, dd,  $J = 12.4, 2.1$  Hz, H-5), 1.19 (1H, m, H-3 $\alpha$ ), 1.35 (1H, m, H-6 $\alpha$ ), 1.42 (1H, m, H-3 $\beta$ ), 1.53 (1H, m, H-2 $\alpha$ ), 1.58 (1H, m, H-2 $\beta$ ), 1.70 (1H, m, H-1 $\beta$ ), 1.75 (1H, m, H-6 $\beta$ ), 1.90 (1H, d,  $J = 10.8$  Hz, H-9), 2.03 (1H, dt,  $J = 12.9, 4.8$  Hz, H-7 $\alpha$ ), 2.33 (1H, m, H-11a), 2.41 (1H, m, H-7 $\beta$ ), 2.50 (1H, ddd,  $J = 16.8, 6.1, 2.7$  Hz, H-11b), 3.39/3.46 (2H, AB quartet,  $J = 16.8$  Hz, H-14), 4.36 (1H, br s, H-17a), 4.86 (1H, br s, H-17b), 6.77 (1H, t,  $J = 6.5$  Hz, H-12), 9.63 (2H, br s, H-15);  $^{13}\text{C-NMR}$  (100 MHz,  $\text{CDCl}_3$ ):  $\delta$  14.44 (C-20), 19.27 (C-2), 21.73 (C-19), 24.10 (C-6), 24.68 (C-11), 33.58 (C-4, 18), 37.84 (C-7), 39.35 (C-14), 39.60 (C-10), 39.23 (C-1), 41.96 (C-3), 55.37 (C-5), 56.53 (C-9), 107.87 (C-17), 134.84 (C-13), 148.03 (C-8), 160.05 (C-12), 193.63 (C-16), 197.38 (C-15); FTIR (neat):  $\nu = 2925, 1694, 1647, 1419, 1282, 891 \text{ cm}^{-1}$ .

*15-Methoxylabda-8(17),11,13-trien-15,16-olide* (6): yellow oil;  $[\alpha]_D^{29} = +10.36$  (*c* 0.52,  $\text{CHCl}_3$ ); HREIMS:  $[\text{M} + \text{H}]^+ 331.2279$  (calcd for  $\text{C}_{21}\text{H}_{31}\text{O}_3$ , 331.2273);  $^1\text{H-NMR}$  (400 MHz,  $\text{CDCl}_3$ ):  $\delta$  0.84 (3H, s, H-19), 0.87 (3H, s, H-20), 0.89 (3H, s, H-18), 0.99 (1H, dt,  $J = 13.1, 2.6$  Hz, H-1 $\alpha$ ), 1.08 (1H, dd,  $J = 12.5, 2.3$  Hz, H-5), 1.18 (1H, dt,  $J = 13.3, 3.5$  Hz, H-3 $\alpha$ ), 1.39 (1H, m, H-3 $\beta$ ), 1.37 (1H, m, H-6 $\alpha$ ), 1.41 (1H, m, H-2 $\alpha$ ), 1.47 (1H, m, H-1 $\beta$ ), 1.52 (1H, m, H-2 $\beta$ ), 1.71 (1H, m, H-6 $\beta$ ), 2.07 (1H, dt,  $J = 13.1, 5.0$  Hz, H-7 $\alpha$ ), 2.37 (1H, d,  $J = 10.1$  Hz, H-9), 2.43 (1H, obscured, H-7 $\beta$ ), 4.47 (1H, br s, H-17a), 4.76 (1H, br s, H-17b), 5.76 (2H, br s, H-15), 6.08 (1H, d,  $J = 15.8$  Hz, H-12), 6.79 (1H, br s, H-14), 6.95/6.97 (1H, dd,  $J = 15.5, 10.1$  Hz, H-11);  $^{13}\text{C-NMR}$  (100 MHz,  $\text{CDCl}_3$ ):  $\delta$  15.07 (C-20), 19.07 (C-2), 21.93 (C-19), 23.32 (C-6), 33.57 (C-4, 18), 36.71 (C-7), 39.34 (C-10), 40.82 (C-1), 42.24 (C-3), 54.66 (C-5), 56.83/56.91 ( $\text{OCH}_3$ ), 62.25/62.26 (C-9), 108.49/108.53 (C-17), 120.27/120.29 (C-12), 132.90 (C-13), 139.55 (C-11), 139.27 (C-14), 149.18 (C-8), 169.62 (C-16); FTIR (neat):  $\nu = 3442, 2926, 1766, 1460, 937 \text{ cm}^{-1}$ .

*16-Hydroxylabda-8(17),11,13-trien-15,16-olide* (7): pale yellow oil;  $[\alpha]_D^{29} = +24.09$  (*c* 0.63,  $\text{CHCl}_3$ ); HREIMS:  $[\text{M} + \text{Na}]^+ 339.1938$  (calcd for  $\text{C}_{20}\text{H}_{28}\text{O}_3\text{Na}$ , 339.1936);  $^1\text{H-NMR}$  (400 MHz,  $\text{CDCl}_3$ ):  $\delta$  0.84 (3H, s, H-19), 0.86 (3H, s, H-20), 0.89 (3H, s, H-18), 1.02 (1H, m, H-1 $\alpha$ ), 1.09 (1H, dd,  $J = 12.6, 2.3$  Hz, H-5), 1.20 (1H, m, H-3 $\alpha$ ), 1.38 (1H, m, H-1 $\beta$ ), 1.40 (1H, m, H-6 $\alpha$ ), 1.41 (1H, m, H-2 $\alpha$ ), 1.43 (1H, m, H-3 $\beta$ ), 1.54 (1H, m, H-2 $\beta$ ), 1.71 (1H, m, H-6 $\beta$ ), 2.10 (1H, m, H-7 $\alpha$ ), 2.44 (1H, m, H-7 $\beta$ ), 2.47 (1H, d,  $J = 10.6$  Hz, H-9), 4.38/4.48 (1H, br s, H-17a), 4.78 (1H, br s, H-17b), 5.85 (1H, br s, H-14), 6.27/6.29 (2H, s, H-16), 6.31 (1H, d,  $J = 16.0$  Hz, H-12), 6.59/6.62 (1H, dd,  $J = 16.0, 10.4$  Hz, H-11);  $^{13}\text{C-NMR}$  (100 MHz,  $\text{CDCl}_3$ ):  $\delta$  15.09/15.16 (C-20), 19.02/19.07 (C-2), 21.93 (C-19), 23.22 (C-6), 33.55 (C-4), 33.58 (C-18), 36.59/36.62 (C-7), 39.50/39.61 (C-10), 40.84/40.99 (C-1), 42.14 (C-3), 54.51/54.53 (C-5), 62.16/62.11 (C-9), 98.00/98.02 (C-16), 108.53/108.97 (C-17), 115.33 (C-14), 120.72/122.78 (C-12), 144.05/144.13 (C-11), 148.61/148.90 (C-8), 161.52 (C-13), 172.03 (C-15); FTIR (neat):  $\nu = 3373, 2927, 1747, 1643, 1129, 891 \text{ cm}^{-1}$ .

*Coronararin D* (8): pale yellow oil;  $[[\alpha]_D^{29} = +13.25$  (*c* 0.85,  $\text{CHCl}_3$ ); HREIMS:  $[\text{M} + \text{Na}]^+ 341.2090$  (calcd for  $\text{C}_{20}\text{H}_{30}\text{O}_3\text{Na}$ , 341.2093);  $^1\text{H-NMR}$  (400 MHz,  $\text{CDCl}_3$ ):  $\delta$  0.72 (3H, s, H-20), 0.81 (3H, s, H-19), 0.88 (3H, s, H-18), 1.07 (1H, m, H-1 $\alpha$ ), 1.12 (1H, dd,  $J = 12.6, 3.0$  Hz, H-5), 1.20 (1H, m, H-3 $\alpha$ ), 1.33 (1H, m, H-6 $\beta$ ), 1.41 (1H, m, H-3 $\beta$ ), 1.52 (1H, m, H-2 $\alpha$ ), 1.58 (1H, m, H-2 $\beta$ ), 1.69 (1H, m, H-1 $\beta$ ), 1.75 (1H, m, H-6 $\alpha$ ), 1.99 (1H, dt,  $J = 12.9, 4.6$  Hz, H-7 $\alpha$ ), 2.21 (1H, m, H-11a), 2.35 (1H, m, H-11b), 2.37 (1H, m, H-7 $\beta$ ), 2.71 (1H, br d,  $J = 16.6$  Hz, H-14a), 2.86 (1H, obscured, H-9), 3.03 (1H, dd,  $J = 15.5, 3.4$  Hz, H-14b), 4.35/4.40 (1H, s, H-17a), 4.83/4.81 (1H, s, H-17b), 5.94 (2H, dd,  $J = 3.3, 2.3$  Hz, H-15), 6.76 (1H, m, H-12);  $^{13}\text{C-NMR}$  (100 MHz,  $\text{CDCl}_3$ ):  $\delta$  14.36 (C-20), 19.33 (C-2), 21.73 (C-19), 24.10 (C-6), 24.54 (C-11), 35.57 (C-4, 18), 33.58 (C-14), 37.79 (C-7), 39.46 (C-10), 39.26 (C-1), 42.00 (C-3), 55.33 (C-5), 56.16 (C-9), 95.96 (C-15), 107.35/107.63 (C-17), 124.17 (C-13), 143.74/143.66 (C-12), 147.93/148.14 (C-8), 170.50 (C-16); FTIR (neat):  $\nu = 3381, 2938, 1737, 1458, 1177, 943 \text{ cm}^{-1}$ .

*Zerumin A (9)*: yellow oil;  $[\alpha]_D^{29} = +12.76$  (c 0.59, CHCl<sub>3</sub>); HREIMS:  $[M + Na]^+$  341.2095 (calcd for C<sub>20</sub>H<sub>30</sub>O<sub>3</sub>Na, 341.2093); <sup>1</sup>H-NMR (400 MHz, CDCl<sub>3</sub>): δ 0.74 (3H, s, H-20), 0.84 (3H, s, H-19), 0.88 (3H, s, H-18), 1.08 (1H, m, H-1α), 1.13 (1H, dd, *J* = 12.6, 3.0 Hz, H-5), 1.22 (1H, m, H-3α), 1.33 (1H, m, H-6β), 1.43 (1H, m, H-3β), 1.52 (1H, m, H-2α), 1.60 (1H, m, H-2β), 1.70 (1H, m, H-1β), 1.76 (1H, m, H-6α), 1.91 (1H, br d, *J* = 10.9 Hz, H-9), 2.02 (1H, dt, *J* = 13.0, 4.9 Hz, H-7α), 2.35 (1H, m, H-11a), 2.57 (1H, ddd, *J* = 13.6, 6.1, 2.8 Hz, H-11b), 2.43 (1H, m, H-7β), 3.33 (1H, AB q, *J* = 16.5 Hz, H-14a), 3.35 (1H, AB q, *J* = 16.5 Hz, H-14b), 4.38 (1H, s, H-17a), 4.85 (1H, s, H-17b), 6.69 (1H, t, *J* = 6.5 Hz, H-12); <sup>13</sup>C-NMR (100 MHz, CDCl<sub>3</sub>): δ 14.42 (C-20), 19.29 (C-2), 21.74 (C-19), 24.11 (C-6), 24.61 (C-11), 29.57 (C-14), 35.59 (C-4, 18), 37.86 (C-7), 39.22 (C-1), 39.59 (C-10), 42.00 (C-3), 55.39 (C-5), 56.39 (C-9), 107.90 (C-17), 135.68 (C-13), 159.42 (C-12), 148.05 (C-8), 174.80 (C-15), 193.68 (C-16); FTIR (neat): ν = 3449, 2929, 1708, 1389, 730 cm<sup>-1</sup>.

*Zerumin B (10)*: colorless crystal; m.p = 108.0–109.0 °C;  $[\alpha]_D^{29} = +28.77$  (c 0.51, CHCl<sub>3</sub>); HREIMS:  $[M + Na]^+$  357.2029 (calcd for C<sub>20</sub>H<sub>30</sub>O<sub>4</sub>Na, 357.2042); <sup>1</sup>H-NMR (400 MHz, CDCl<sub>3</sub>): δ 0.67 (3H, s, H-20), 0.80 (3H, s, H-19), 0.88 (3H, s, H-18), 1.06 (1H, dt, *J* = 12.4, 4.0 Hz, H-1α), 1.17 (1H, m, H-5), 1.22 (1H, m, H-3α), 1.33 (1H, m, H-6β), 1.41 (1H, m, H-3β), 1.50 (1H, m, H-2α), 1.58 (1H, m, H-2β), 1.65 (1H, m, H-11a), 1.69 (1H, m, H-1β), 1.76 (1H, m, H-6α), 1.83 (1H, m, H-11b), 2.04 (1H, m, H-7α), 2.06 (1H, m, H-9), 2.40 (1H, br d, *J* = 12.3 Hz, H-7β), 4.65/4.69 (1H, s, H-17b), 4.87/4.88 (1H, s, H-17a), 4.51 (1H, br d, *J* = 9.7 Hz, H-12), 7.04/7.07 (1H, s, H-14); <sup>13</sup>C-NMR (100 MHz, CDCl<sub>3</sub>): δ 14.49/14.61 (C-20), 19.33 (C-2), 21.69/21.94 (C-19), 24.36 (C-6), 29.87/30.14 (C-11), 33.60 (C-4, 18), 38.24/38.27 (C-7), 38.94 (C-1), 38.80/39.89 (C-10), 42.05 (C-3), 55.43/55.50 (C-5), 51.79/51.90 (C-9), 65.46/66.16 (C-12), 97.57/98.42 (C-15), 106.88/107.66 (C-17), 142.21 (C-13), 144.01/144.10 (C-14), 148.21/148.27 (C-8), 171.05/171.09 (C-16); FTIR (neat): ν = 3417, 2941, 1746, 1642 cm<sup>-1</sup>.

Table S1. <sup>1</sup>H-, <sup>13</sup>C-NMR and HMBC data of compounds 6 and 7.

| Positions                      | $\delta$ <sup>1</sup> H (Mult., J in Hz) |                                           |                                  | $\delta$ <sup>13</sup> C |                | HMBC                       |                      |
|--------------------------------|------------------------------------------|-------------------------------------------|----------------------------------|--------------------------|----------------|----------------------------|----------------------|
|                                | Compound 6                               | Compound 7                                | Ref. (Kiem <i>et al.</i> , 2012) | Compound 6               | Compound 7     | Compound 6                 | Compound 7           |
| 1 <sup>a</sup>                 | $\alpha$ 0.99 ( <i>dt</i> , 13.1, 2.6)   | $\alpha$ 1.02 ( <i>m</i> )                | 1.00 ( <i>dt</i> , 3.5, 13.0)    | 40.82                    | 40.84; 40.99   | C-2, 9, 10                 | C-2, 3, 10, 20       |
|                                | $\beta$ 1.47 ( <i>m</i> )                | $\beta$ 1.38 ( <i>m</i> )                 | 1.45                             |                          |                |                            |                      |
| 2 <sup>a</sup>                 | $\alpha$ 1.41 ( <i>m</i> )               | $\alpha$ 1.41 ( <i>m</i> )                | 1.42                             | 19.07                    | 19.02; 19.07   | C-1, 3                     | C-1, 3, 4            |
|                                | $\beta$ 1.52 ( <i>m</i> )                | $\beta$ 1.54 ( <i>m</i> )                 | 1.50                             |                          |                |                            |                      |
| 3                              | $\alpha$ 1.18 ( <i>dt</i> , 13.3, 3.5)   | $\alpha$ 1.20 ( <i>m</i> )                | 1.18 ( <i>dt</i> , 3.5, 12.5)    | 42.24                    | 42.14          | C-1, 2, 4, 5               | C-1, 2, 4, 18, 19    |
|                                | $\beta$ 1.39 ( <i>m</i> )                | $\beta$ 1.43 ( <i>m</i> )                 | 1.44                             |                          |                |                            |                      |
| 4                              | –                                        | –                                         | –                                | 33.57                    | 33.55          |                            |                      |
| 5 <sup>a</sup>                 | 1.08 ( <i>dd</i> , 12.5, 2.3)            | 1.09 ( <i>dd</i> , 12.6, 2.3)             | 1.09 ( <i>dd</i> , 2.5, 12.5)    | 54.66                    | 54.51; 54.53   | C-4, 6, 9, 10, 20          | C-4, 6, 10, 20       |
| 6                              | $\alpha$ 1.37 ( <i>m</i> )               | $\alpha$ 1.40 ( <i>m</i> )                | 1.39                             | 23.32                    | 23.22          | C-5, 7, 8, 10              | C-5, 7, 8, 10        |
|                                | $\beta$ 1.71 ( <i>m</i> )                | $\beta$ 1.71 ( <i>m</i> )                 | 1.71                             |                          |                |                            |                      |
| 7 <sup>a</sup>                 | $\alpha$ 2.07 ( <i>dt</i> , 13.1, 5.0)   | $\alpha$ 2.10 ( <i>m</i> )                | 2.08 ( <i>dt</i> , 5.0, 13.0)    | 36.71                    | 36.59; 36.62   | C-5, 6, 8, 9, 17           | C-5, 6, 8, 9, 17     |
|                                | $\beta$ 2.43                             | $\beta$ 2.44 ( <i>m</i> )                 | 2.43                             |                          |                |                            |                      |
| 8 <sup>a</sup>                 | –                                        | –                                         | –                                | 149.18                   | 148.61; 148.90 |                            |                      |
| 9 <sup>a</sup>                 | 2.37 ( <i>br d</i> , 10.1)               | 2.47 ( <i>br d</i> , 10.6)                | 2.38 ( <i>d</i> , 9.5)           | 62.25; 62.26             | 62.16; 62.11   | C-5, 8, 10, 11, 12, 17, 20 | C-8, 10, 11, 12,     |
| 10 <sup>a</sup>                | –                                        | –                                         | –                                | 39.34                    | 39.50; 39.61   |                            |                      |
| 11 <sup>a</sup>                | 6.97 ( <i>dd</i> , 15.5, 10.1);          | 6.58 ( <i>dd</i> , 16.0, 10.4)            | 6.96 ( <i>dd</i> , 10.0, 16.0)   | 139.55                   | 144.05; 144.13 | C- 8, 9, 10, 12, 13        | C- 8, 9, 10, 13      |
|                                | 6.95 ( <i>dd</i> , 15.5, 10.7)           | 6.62 ( <i>dd</i> , 16.0, 10.4)            | 2.46 ( <i>m</i> )                | –                        | –              |                            |                      |
| 12 <sup>a</sup>                | 6.08 ( <i>d</i> , 15.8)                  | 6.31 ( <i>d</i> , 16.0)                   | 6.10 ( <i>d</i> , 16.0)          | 120.27; 120.29           | 122.72; 122.78 | C-8, 9, 10, 11, 13, 16     | C-9, 10, 13, 14, 16  |
| 13                             | –                                        | –                                         | –                                | 132.90                   | 161.52         |                            |                      |
| 14                             | 6.79 ( <i>br s</i> )                     | 5.85 ( <i>br s</i> )                      | 6.78 ( <i>s</i> )                | 139.27                   | 115.33         | C-12, 13, 15, 16           | C-11, 12, 13, 15, 16 |
| 15                             | 5.76 ( <i>br s</i> )                     |                                           | 5.76 ( <i>s</i> )                | 101.95                   | 172.03         | C-12, 13, 14, 16, 21       |                      |
| 16                             | –                                        | 6.27 ( <i>s</i> ); 6.29 ( <i>s</i> )      | –                                | 169.62                   | 98.00; 98.02   | C-12, 13, 14               | C-14, 15             |
| 17 <sup>a a</sup>              | 4.47 ( <i>br s</i> )                     | 4.38 ( <i>br s</i> )/4.48 ( <i>br s</i> ) | 4.76 ( <i>br s</i> )             | 108.49; 108.53           | 108.53; 108.97 | C-7, 8, 9                  | C-7, 8, 9            |
| 17 <sup>a b</sup>              | 4.76 ( <i>br s</i> )                     | 4.78 ( <i>br s</i> )                      | 4.48 ( <i>br s</i> )             | –                        | –              |                            |                      |
| 18                             | 0.89 ( <i>s</i> )                        | 0.89 ( <i>s</i> )                         | 0.89 ( <i>s</i> )                | 33.57                    | 33.58          | C-3, 4, 5, 19              | C-3, 4, 5, 19        |
| 19                             | 0.84 ( <i>s</i> )                        | 0.84 ( <i>s</i> )                         | 0.84 ( <i>s</i> )                | 21.93                    | 21.93          | C-3, 4, 5, 18              | C-3, 4, 5, 18        |
| 20 <sup>a</sup>                | 0.87 ( <i>s</i> )                        | 0.86 ( <i>s</i> )                         | 0.87 ( <i>s</i> )                | 15.07                    | 15.09; 15.16   | C-1, 5, 9, 10              | C-1, 5, 9, 10        |
| –OCH <sub>3</sub> <sup>a</sup> | 3.57/3.58 ( <i>s</i> )                   | –                                         | 3.56 ( <i>s</i> )                | 56.83; 56.91             | –              | C-15                       |                      |

<sup>a</sup> Signals appeared in pair.

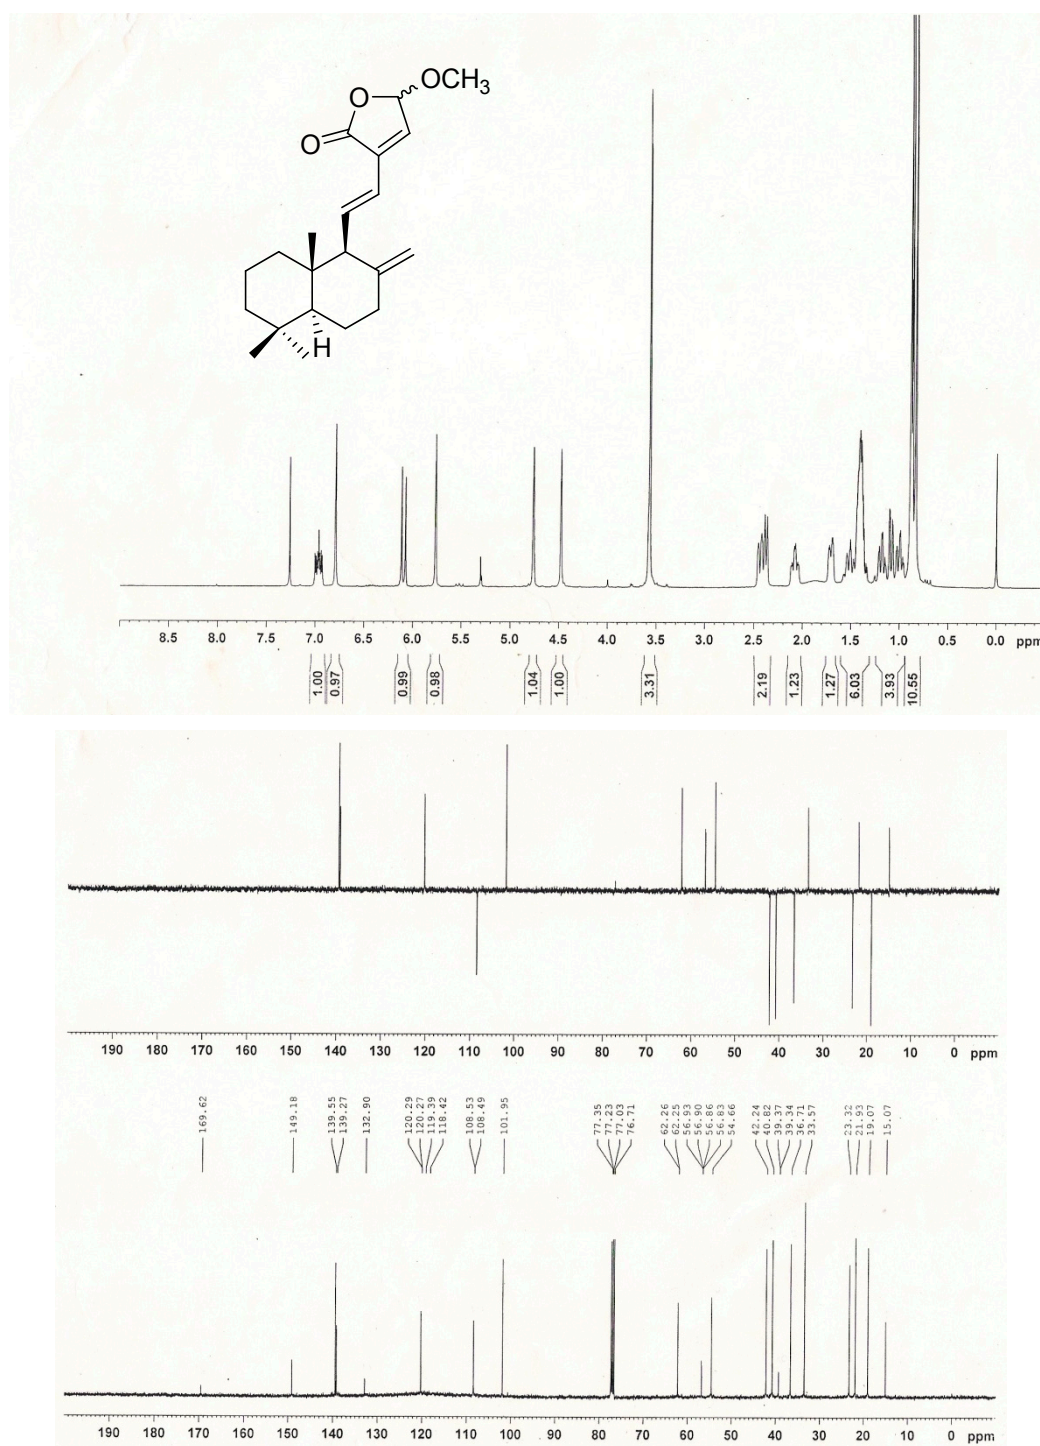

Figure S1.  $^1\text{H}$ ,  $^{13}\text{C}$  and DEPT 135 NMR spectra of 15-methoxyabda-8(17),11,13-trien-15,16-olide (6) ( $\text{CDCl}_3$ ).

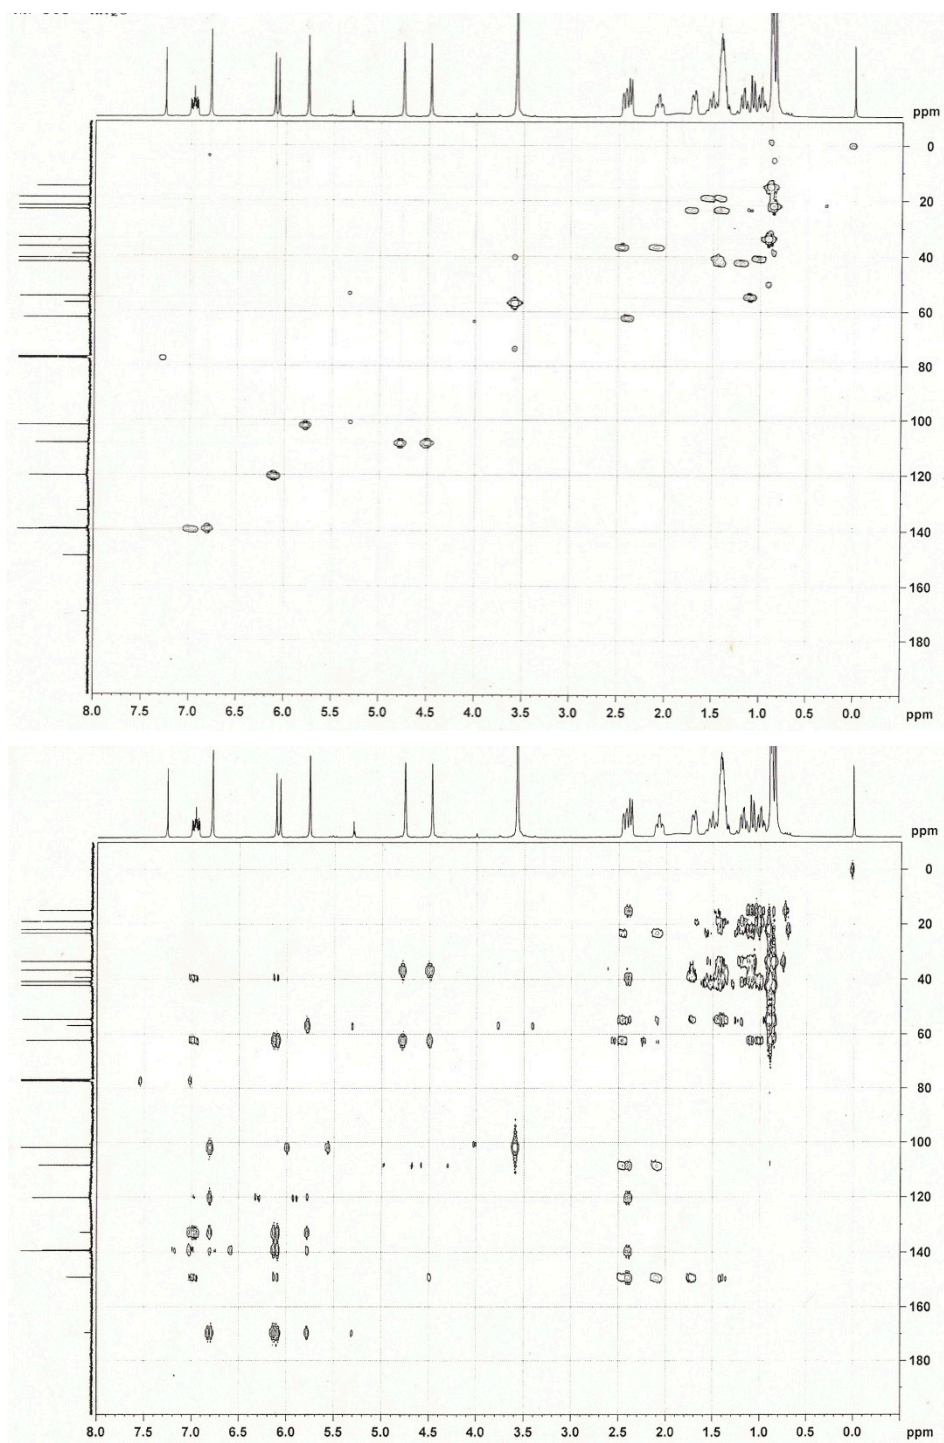

Figure S2. HMQC and HMBC spectra of 15-methoxyabda-8(17),11,13-trien-15,16-olide (6).

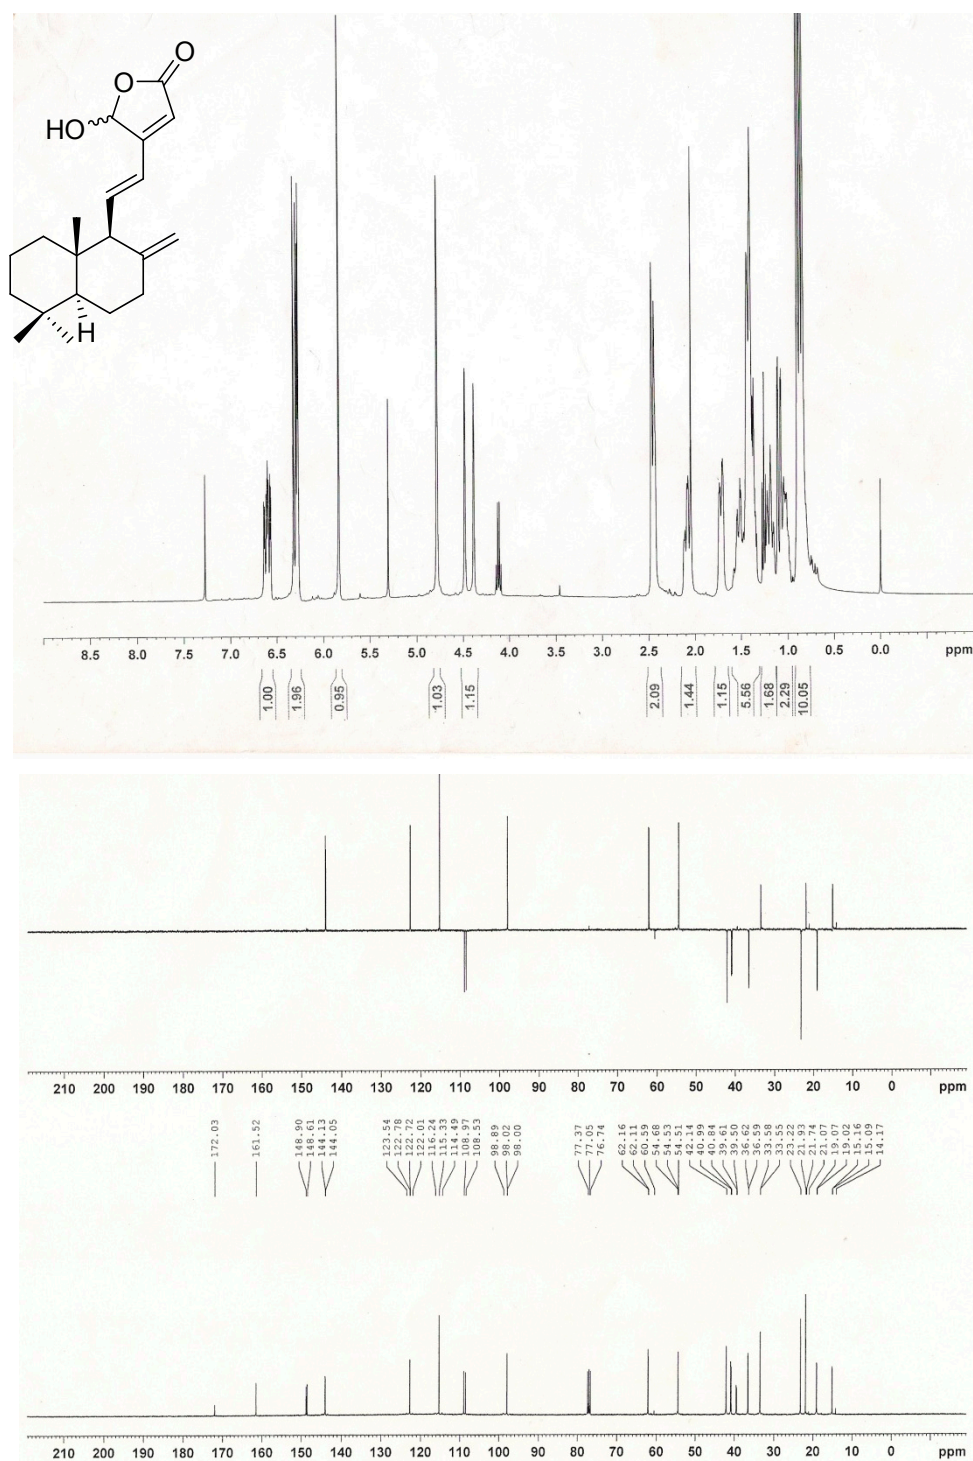

Figure S3. <sup>1</sup>H, <sup>13</sup>C and DEPT 135 NMR spectra of 16-hydroxyabda-8(17),11,13-trien-15,16-olide (7) (CDCl<sub>3</sub>).

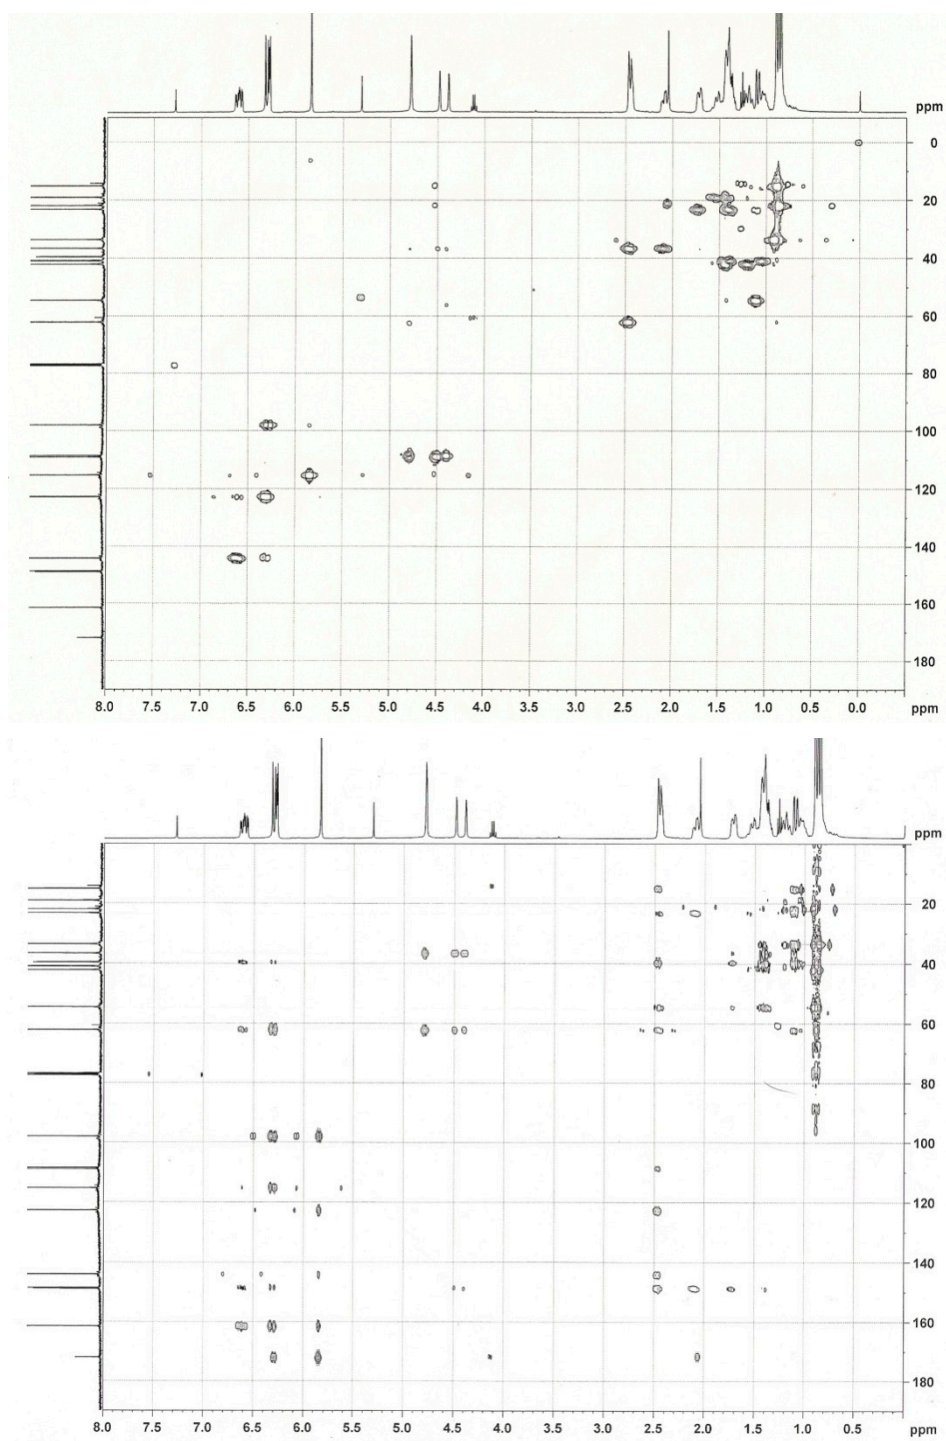

**Figure S4.** HMQC and HMBC spectra of 16-hydroxyabda-8(17),11,13-trien-15,16-olide (7).
